# Supplementary material for: Photoconductive PbSe thin films for infrared imaging
Source: Royal Society of Chemistry journal article supplement (doi:10.1039/d0ma00965b), 2021-01-01
Supplement: d0ma00965b1.pdf [file d0ma00965b1.pdf]

## Photoconductive PbSe Thin Films for Infrared Imaging

Mool C. Gupta, <sup>a</sup> Joel T. Harrison, <sup>a</sup> and Md Toriqul Islam <sup>a</sup>

### Supplemental Information

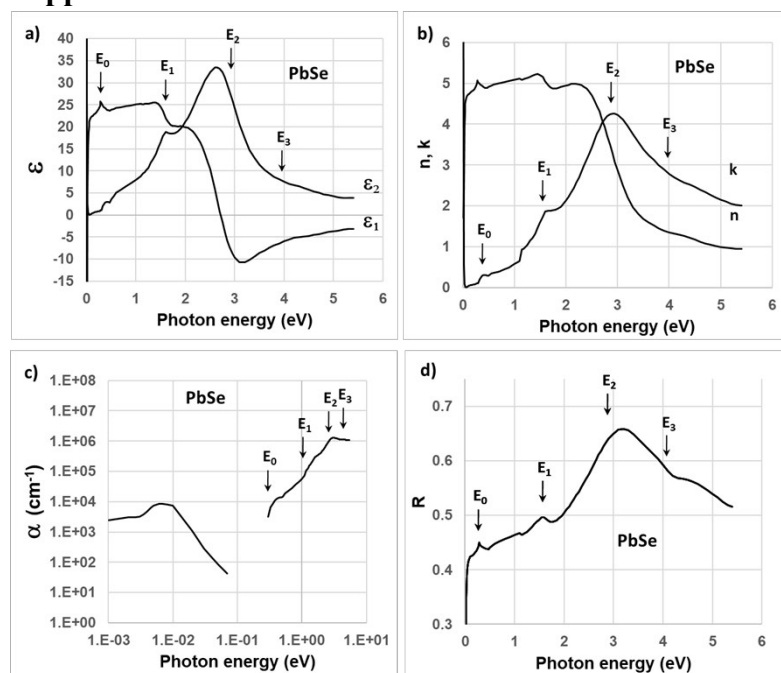

Figure S1: Plots of a)  $\epsilon_1(E)$  and  $\epsilon_2(E)$ ,

b)  $n(E)$  and  $k(E)$ , c)  $\alpha(E)$  and d)  $R(E)$  spectra for PbSe at 300 K.<sup>62</sup>
